# Supplementary material for: Overproduction of lipopeptide biosurfactant by Aneurinibacillus thermoaerophilus HAK01 in various fed-batch modes under thermophilic conditions
Source: Royal Society of Chemistry journal article supplement (doi:10.1039/c9ra02645b), 2019-01-01
Supplement: c9ra02645b1.pdf [file c9ra02645b1.pdf]

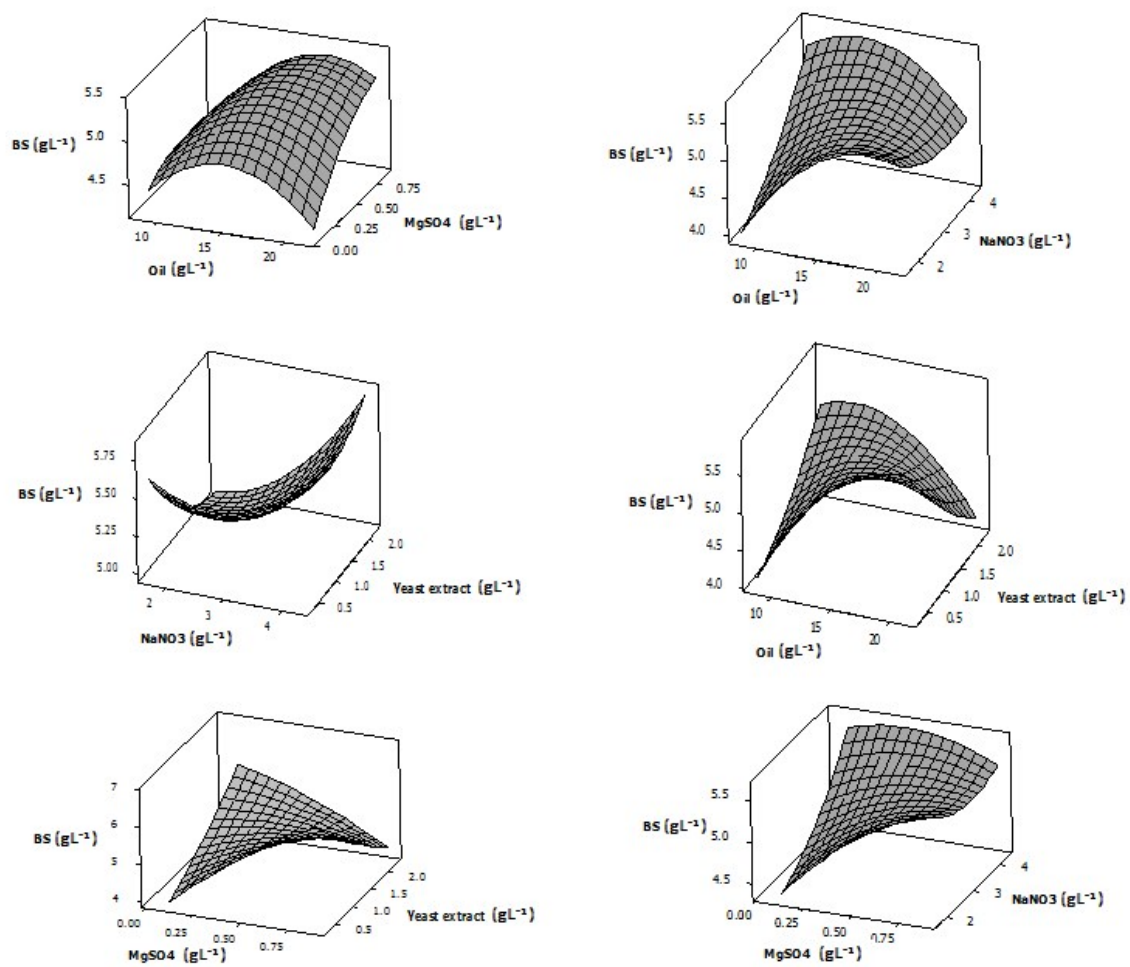

Fig. S1. Response surfaces plots showing the mutual effects of interactions between factors

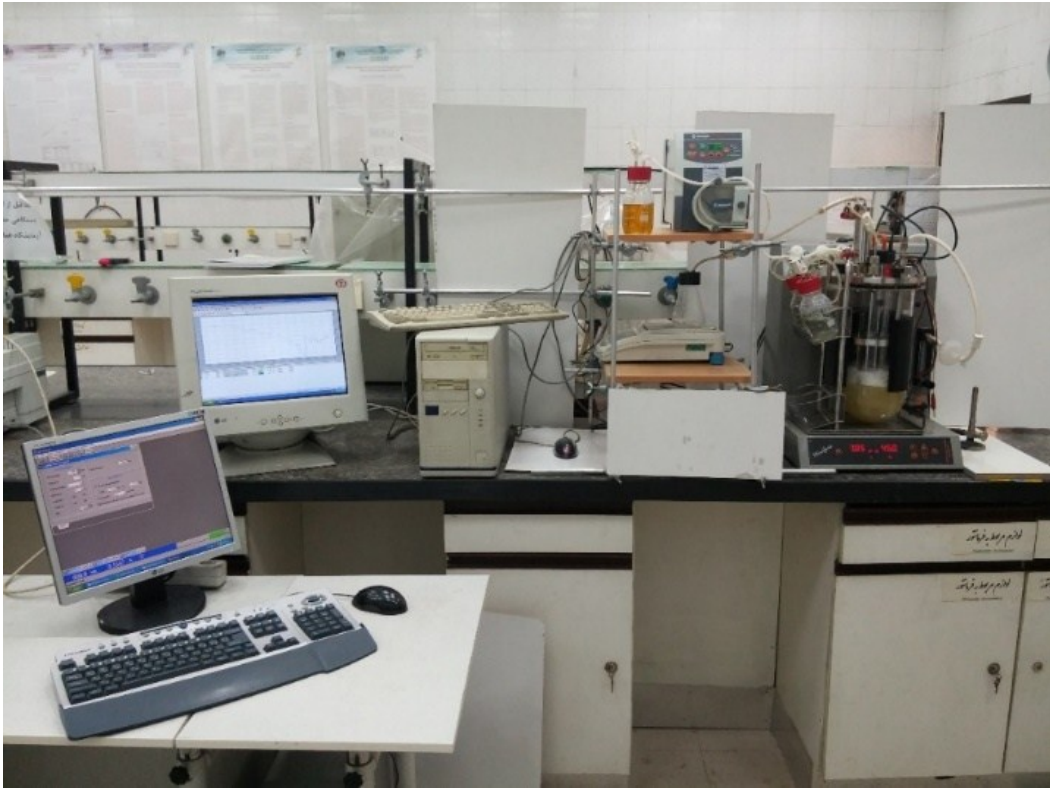

Fig. S2. Fed-batch setup

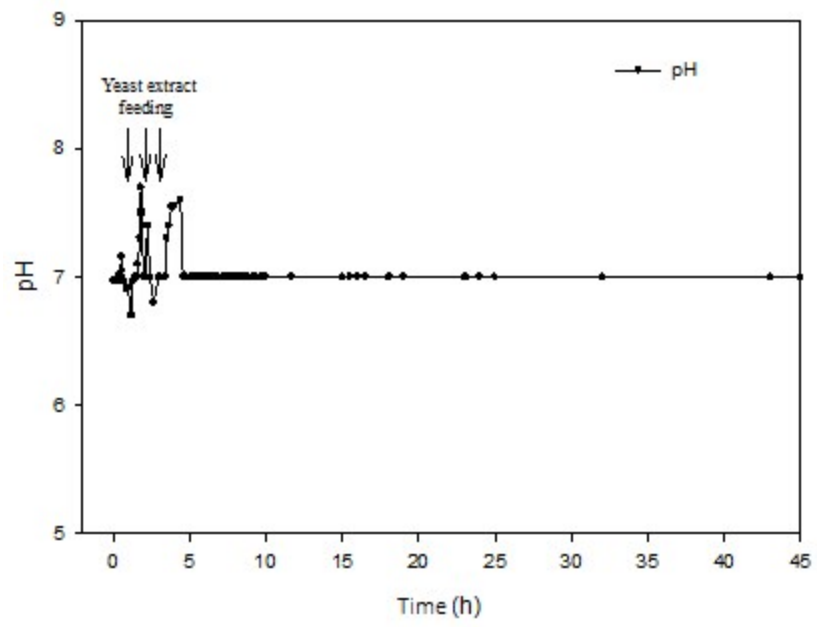

Fig. S3. Variation in pH over time in pH-stat strategy

Table S1. Central composite design matrix with experimental values of BS production

| Run Order | Oil(gL <sup>-1</sup> ) | MgSO <sub>4</sub> (gL <sup>-1</sup> ) | NaNO <sub>3</sub> (gL <sup>-1</sup> ) | Yeast extract(gL <sup>-1</sup> ) | BS (gL <sup>-1</sup> ) |
|-----------|------------------------|---------------------------------------|---------------------------------------|----------------------------------|------------------------|
| 1         | 15                     | 0.5                                   | 3                                     | 1.25                             | 5.15                   |
| 2         | 20                     | 0.2                                   | 4                                     | 0.5                              | 4.75                   |
| 3         | 20                     | 0.8                                   | 4                                     | 0.5                              | 6.2                    |
| 4         | 15                     | 0.5                                   | 3                                     | 1.25                             | 5.15                   |
| 5         | 10                     | 0.8                                   | 2                                     | 2                                | 4.35                   |
| 6         | 20                     | 0.2                                   | 4                                     | 2                                | 5.15                   |
| 7         | 15                     | 0.5                                   | 3                                     | 2.225                            | 5.2                    |
| 8         | 10                     | 0.8                                   | 4                                     | 2                                | 4.9                    |
| 9         | 20                     | 0.8                                   | 2                                     | 2                                | 4.5                    |
| 10        | 10                     | 0.8                                   | 2                                     | 0.5                              | 4.95                   |
| 11        | 15                     | 0.5                                   | 1.7                                   | 1.25                             | 5.15                   |
| 12        | 20                     | 0.2                                   | 2                                     | 0.5                              | 4.7                    |
| 13        | 20                     | 0.8                                   | 4                                     | 2                                | 4.2                    |
| 14        | 15                     | 0.11                                  | 3                                     | 1.25                             | 4.7                    |
| 15        | 15                     | 0.5                                   | 3                                     | 1.25                             | 6                      |
| 16        | 15                     | 0.5                                   | 3                                     | 0.275                            | 5.3                    |
| 17        | 10                     | 0.2                                   | 4                                     | 2                                | 6.6                    |
| 18        | 15                     | 0.5                                   | 3                                     | 1.25                             | 5.3                    |
| 19        | 15                     | 0.5                                   | 3                                     | 1.25                             | 5.1                    |
| 20        | 15                     | 0.5                                   | 3                                     | 1.25                             | 5.2                    |
| 21        | 15                     | 0.89                                  | 3                                     | 1.25                             | 5.15                   |
| 22        | 20                     | 0.2                                   | 2                                     | 2                                | 4.6                    |
| 23        | 21.5                   | 0.5                                   | 3                                     | 1.25                             | 4.8                    |
| 24        | 15                     | 0.5                                   | 4.3                                   | 1.25                             | 5.45                   |
| 25        | 10                     | 0.8                                   | 4                                     | 0.5                              | 5.6                    |
| 26        | 20                     | 0.8                                   | 2                                     | 0.5                              | 7.1                    |
| 27        | 10                     | 0.2                                   | 2                                     | 2                                | 4.95                   |
| 28        | 10                     | 0.2                                   | 4                                     | 0.5                              | 4.4                    |
| 29        | 8.5                    | 0.5                                   | 3                                     | 1.25                             | 4.4                    |
| 30        | 15                     | 0.5                                   | 3                                     | 1.25                             | 5                      |
| 31        | 10                     | 0.2                                   | 2                                     | 0.5                              | 3.4                    |

Table S2. Results of Oil Spreading Test for identification of BS producer bacteria, (140 bacteria is listed here in two different media with glucose (g) or oil (o) as the sole carbon source). Selected strains have been written in Bold.

| Bacterium # | Oil spreading test (mm) |         |         | Bacterium # | Oil spreading test (mm) |            |           | Bacterium # | Oil spreading test (mm) |            |           |
|-------------|-------------------------|---------|---------|-------------|-------------------------|------------|-----------|-------------|-------------------------|------------|-----------|
|             | 1st day                 | 2nd day | 3rd day |             | 1st day                 | 2nd day    | 3rd day   |             | 1st day                 | 2nd day    | 3rd day   |
| 1-o         |                         | 4       | 4       | 21-o        | 5                       | 5          | 2         | 42-o        | 2                       | 4          | 3         |
| 1-g         |                         | 9       | 1       | 21-g        | 2                       | 2          | 2         | 42-g        | 0                       | 0          | 2         |
| 2-o         |                         | 3       | 3       | 22-o        |                         | 10         | 3         | <b>43-o</b> | <b>90</b>               | <b>90</b>  | <b>90</b> |
| 2-g         |                         | 1       | 5       | 22-g        |                         | 3          | 1         | 43-g        | 3                       | 15         | 2         |
| 3-o         |                         | 4       | 3       | 23-o        | 2                       | 1          | 4         | 44-o        | 1                       | 3          | 1         |
| 3-g         |                         | 1       | 0       | 23-g        | 0                       | 0          | 1         | 44-g        | 0                       | 1          | 0         |
| 4-o         |                         | 3       | 5       | 24-o        |                         | 0          | 1         | 45-o        | 7                       | 5          | 3         |
| 4-g         |                         | 4       | 1       | 24-g        |                         | 2          | 1         | 45-g        | 2                       | 2          | 1         |
| 6-o         |                         | 1       | 0       | 25-o        | 6                       | 0          | 3         | 46-o        | 2                       | 2          | 5         |
| 6-g         |                         | 0       | 0       | 25-g        | 0                       | 1          | 1         | 46-g        | 1                       | 4          | 2         |
| 8-o         | 2                       | 3       | 3       | 26-o        | 0                       | 4          | 6         | <b>47-o</b> | <b>90</b>               | <b>100</b> | <b>90</b> |
| 8-g         | 0                       | 2       | 5       | 26-g        | 0                       | 0          | 0         | 47-g        | 4                       | 7          | 3         |
| 9-o         |                         | 3       | 2       | 28-o        | 1                       | 3          | 5         | 50-o        | 2                       | 0          | 0         |
| 9-g         |                         | 0       | 0       | 28-g        | 0                       | 0          | 3         | 50-g        | 0                       | 0          | 0         |
| 10-o        |                         | 10      | 5       | 29-o        | 5                       | 5          | 5         | 55-o        | 4                       | 2          | 2         |
| 10-g        |                         | 0       | 0       | 29-g        | 0                       | 0          | 0         | 55-g        | 0                       | 2          | 1         |
| 11-o        |                         | 4       | 7       | 30-o        |                         | 1          | 0         | 56-o        | 3                       | 17         | 30        |
| 11-g        |                         | 4       | 2       | 30-g        |                         | 3          | 2         | 56-g        | 2                       | 2          | 1         |
| 12-o        |                         | 50      | 20      | <b>31-o</b> | <b>50</b>               | <b>100</b> | <b>90</b> | 57-o        | 3                       | 5          | 7         |
| 12-g        |                         | ?       | 0       | 31-g        | 3                       | 10         | 8         | 57-g        | 2                       | 3          | 4         |
| 13-o        |                         | 5       | 3       | 32-o        | 0                       | 0          | 0         | 58-o        | 2                       | 5          | 10        |
| 13-g        |                         | 2       | 0       | 32-g        | 0                       | 0          | 1         | 58-g        | 2                       | 3          | 4         |
| 14-o        |                         | 5       | 0       | 33-o        | 10                      | 5          | 2         | 59-o        | 2                       | 5          | 2         |
| 14-g        |                         | 0       | 0       | 33-g        | 2                       | 2          | 3         | 59-g        | 2                       | 1          | 2         |
| 15-o        |                         | 0       | 4       | 34-o        |                         | 5          | 5         | 61-o        | 3                       | 7          | 3         |
| 15-g        |                         | 2       | 2       | 34-g        |                         | 0          | 0         | 61-g        | 3                       | 2          | 5         |
| 16-o        |                         | 4       | 2       | 35-o        | 2                       | 0          | 2         | 63-o        | 1                       | 2          | 2         |
| 16-g        |                         | 2       | 4       | 35-g        | 4                       | 2          | 4         | 63-g        | 2                       | 3          | 2         |
| 18-o        | 1                       | 4       | 4       | 36-o        | 0                       | 5          | 3         | 64-o        | 1                       | 0          | 2         |
| 18-g        | 0                       | 2       | 0       | 36-g        | 0                       | 0          | 3         | 64-g        | 2                       | 3          | 2         |
| 19-o        | 2                       | 3       | 4       | 37-o        | 0                       | 2          | 1         | 65-o        | 1                       | 3          | 8         |
| 19-g        | 2                       | 3       | 3       | 37-g        | 2                       | 5          | 7         | 65-g        | 1                       | 3          | 5         |
| 20-o        | 2                       | 3       | 6       | 41-o        | 2                       | 2          | 1         | 68-o        | 4                       | 5          | 5         |
| 20-g        | 0                       | 0       | 1       | 41-g        | 2                       | 2          | 2         | 68-g        | 4                       | 2          | 3         |

Table S2. Continued

| Bacterium # | Oil spreading test (mm) |           |           | Bacterium # | Oil spreading test (mm) |         |         | Bacterium #  | Oil spreading test (mm) |           |           |
|-------------|-------------------------|-----------|-----------|-------------|-------------------------|---------|---------|--------------|-------------------------|-----------|-----------|
|             | 1st day                 | 2nd day   | 3rd day   |             | 1st day                 | 2nd day | 3rd day |              | 1st day                 | 2nd day   | 3rd day   |
| 69-o        | 2                       | 2         | 4         | 104-o       |                         | 2       | 2       | 123-o        |                         | 2         | 1         |
| 69-g        | 1                       | 1         | 2         | 104-g       |                         | 3       | 0       | 123-g        |                         | 3         | 2         |
| 70          |                         |           |           | 105-o       |                         | 2       | 4       | 124-o        |                         | 3         | 3         |
| 71-o        | 0                       | 1         | 5         | 105-g       |                         | 3       | 2       | 124-g        |                         | 2         | 0         |
| 71-g        | 5                       | 5         | 5         | 106-o       |                         | 6       | 3       | 125-o        |                         | 4         | 3         |
| 72-o        |                         | 0         | 0         | 106-g       |                         | 3       | 3       | 125-g        |                         | 0         | 2         |
| 72-g        |                         | 3         | 4         | 107-o       |                         | 3       | 0       | 126-o        |                         | 0         | 0         |
| 75-o        | 1                       | 1         | 5         | 107-g       |                         | 3       | 3       | 126-g        |                         | 3         | 0         |
| 75-g        | 5                       | 5         | 6         | 108-o       |                         | 3       | 3       | <b>127-o</b> |                         | <b>55</b> | <b>45</b> |
| 77-o        | 2                       | 0         |           | 108-g       |                         | 30      | 40      | 127-g        |                         | 3         | 4         |
| 77-g        | 0                       | 0         |           | 109-o       |                         | 3       | 3       | 128-o        |                         | 0         | 2         |
| 78-o        | 5                       | 5         | 11        | 109-g       |                         | 20      | 20      | 128-g        |                         | 1         | 4         |
| 78-g        | 5                       | 5         | 5         | 110-o       |                         | 0       | 5       | 130-o        |                         | 0         | 3         |
| 84-o        | 3                       | 2         |           | 110-g       |                         | 0       | 3       | 130-g        |                         | 3         | 3         |
| 84-g        | 2                       | 3         |           | 111-o       |                         | 5       | 5       | 131-o        |                         | 4         | 2         |
| <b>91-o</b> | <b>30</b>               | <b>90</b> | <b>70</b> | 111-g       |                         | 2       | 2       | 131-g        |                         | 0         | 0         |
| 91-g        | 1                       | 3         | 5         | 112-o       |                         | 4       | 3       | 132-o        |                         | 2         | 2         |
| 92-o        | 1                       | 2         | 2         | 112-g       |                         | 2       | 2       | 132-g        |                         | 2         | 2         |
| 92-g        | 2                       | 5         | 3         | 113-o       |                         | 3       | 3       | 133-o        |                         | 3         | 3         |
| 93-o        | 2                       | 3         | 5         | 113-g       |                         | 3       | 4       | 133-g        |                         | 0         | 1         |
| 93-g        | 2                       | 0         | 1         | 114-o       |                         | 3       | 3       | 134-o        |                         | 3         | 3         |
| 94-o        | 20                      | 30        | 45        | 114-g       |                         | 2       | 0       | 134-g        |                         | 3         | 3         |
| 94-g        | 3                       | 3         | 5         | 115-o       |                         | 6       | 0       | 135-o        |                         | 4         | 3         |
| 95-o        | 2                       | 2         | 2         | 115-g       |                         | 4       | 0       | 135-g        |                         | 3         | 3         |
| 95-g        | 3                       | 2         | 2         | 116-o       |                         | 0       | 0       | 136-o        |                         | 2         | 3         |
| <b>96-o</b> | <b>35</b>               | <b>45</b> | <b>90</b> | 116-g       |                         | 2       | 2       | 136-g        |                         | 3         | 0         |
| <b>96-g</b> | <b>10</b>               | <b>20</b> | <b>40</b> | 117-o       |                         | 2       | 7       | 137-o        |                         | 4         | 0         |
| 97-o        | 2                       | 4         | 11        | 117-g       |                         | 2       | 4       | 137-g        |                         | 0         | 0         |
| 97-g        | 3                       | 4         | 4         | 118-o       |                         | 2       | 3       | 138-o        |                         | 2         | 4         |
| 98-o        | 1                       | 2         | 5         | 118-g       |                         | 10      | 5       | 138-g        |                         | 0         | 0         |
| 98-g        | 5                       | 3         | 3         | 119-o       |                         | 4       | 3       | 139-o        |                         | 0         | 0         |
| 99-o        | 2                       | 2         | 1         | 119-g       |                         | 3       | 0       | 139-g        |                         | 1         | 1         |
| 99-g        | 3                       | 1         | 5         | 120-o       |                         | 40      | 4       | 140-o        |                         | 1         | 1         |
| 100-o       | 3                       | 1         | 1         | 120-g       |                         | 2       | 3       | 140-g        |                         | 6         | 4         |
| 100-g       | 15                      | 5         | 6         | 121-o       |                         | 7       | 10      | 74-o         | 3                       | 1         | 11        |
| 101-o       | 1                       | 2         | 2         | 121-g       |                         | 3       | 3       | 74-g         | 3                       | 2         | 6         |
| 101-g       | 1                       | 2         | 4         | 122-o       |                         | 2       | 1       | <b>81-o</b>  | <b>2</b>                | <b>40</b> | <b>40</b> |
| 102-o       | 1                       | 1         | 3         | 122-g       |                         | 0       | 4       | 81-g         | 5                       | 2         | 3         |

Table S3. Analysis of RSM model variance (ANOVA) for BS production

| Source                               | DF | Seq SS  | Adj SS  | Adj MS  | F      | P      |
|--------------------------------------|----|---------|---------|---------|--------|--------|
| Regression                           | 14 | 14.2900 | 14.2900 | 1.02071 | 17.58  | >0.001 |
| Linear                               | 4  | 1.9857  | 4.5069  | 1.12673 | 19.40  | >0.001 |
| oil                                  | 1  | 0.3408  | 1.6954  | 1.69539 | 29.19  | >0.001 |
| MgSO4                                | 1  | 0.7589  | 1.0519  | 1.05190 | 18.11  | 0.001  |
| NaNO3                                | 1  | 0.6837  | 0.0405  | 0.04046 | 0.70   | 0.416  |
| yeast                                | 1  | 0.2023  | 0.8762  | 0.87619 | 15.09  | 0.001  |
| Square                               | 4  | 0.8559  | 0.8559  | 0.21396 | 3.68   | 0.026  |
| oil*oil                              | 1  | 0.6525  | 0.6246  | 0.62464 | 10.76  | 0.005  |
| MgSO4* MgSO4                         | 1  | 0.0191  | 0.0795  | 0.07947 | 1.37   | 0.259  |
| NaNO <sub>3</sub> *NaNO <sub>3</sub> | 1  | 0.1330  | 0.0929  | 0.09287 | 1.60   | 0.224  |
| yeast*yeast                          | 1  | 0.0513  | 0.0513  | 0.05131 | 0.88   | 0.361  |
| Interaction                          | 6  | 11.4484 | 11.4484 | 1.90807 | 32.85  | 0.000  |
| oil* MgSO4                           | 1  | 0.3452  | 0.3452  | 0.34516 | 5.94   | 0.027  |
| oil*NaNO3                            | 1  | 1.2377  | 1.2377  | 1.23766 | 21.31  | 0.000  |
| oil*yeast                            | 1  | 2.8477  | 2.8477  | 2.84766 | 49.03  | 0.000  |
| MgSO4*NaNO3                          | 1  | 0.6602  | 0.6602  | 0.66016 | 11.37  | 0.004  |
| MgSO4*yeast                          | 1  | 6.1877  | 6.1877  | 6.18766 | 106.54 | 0.000  |
| NaNO3*yeast                          | 1  | 0.1702  | 0.1702  | 0.17016 | 2.93   | 0.106  |
| Residual Error                       | 16 | 0.9292  | 0.9292  | 0.05808 |        |        |
| Lack-of-Fit                          | 10 | 0.2599  | 0.2599  | 0.02599 | 0.23   | 0.979  |
| Pure Error                           | 6  | 0.6693  | 0.6693  | 0.11155 |        |        |
| Total                                | 30 | 15.2192 |         |         |        |        |
